# Supplementary material for: Development of Z-scheme bimetallic tungstate-supported nitrogen deficient g-C3N4heterojunction for the treatment of refractory pharmaceutical pollutants
Source: Royal Society of Chemistry journal article supplement (doi:10.1039/d3nj00660c), 2023-01-01
Supplement: d3nj00660c1.pdf [file d3nj00660c1.pdf]

## Development of Z-scheme bimetallic tungstate-supported nitrogen deficient g-C<sub>3</sub>N<sub>4</sub> heterojunction for the treatment of refractory pharmaceutical pollutants

H. Leelavathi <sup>a</sup>, R. Muralidharan <sup>b</sup>, N. Abirami <sup>a</sup>, R. Arulmozhi <sup>a\*</sup>

<sup>a</sup> Department of Chemistry, SRM Institute of Science and Technology,  
Kattankulathur, Chengalpattu-603 203, Tamil Nadu, India.

<sup>b</sup> Department of Physics, Saveetha School of Engineering, Saveetha Institute of Medical and  
Technical Sciences, Thandalam, Chennai-602 105, Tamil Nadu, India.

[\\*arulmozh@srmist.edu.in](mailto:*arulmozh@srmist.edu.in)

### 3. Results and Discussion

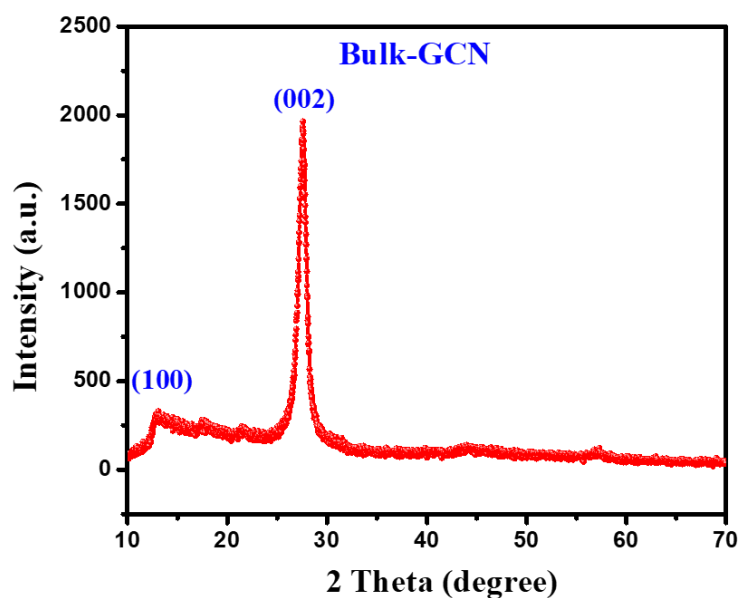

Fig. S1 PXRD spectrum of bulk-GCN.

Table S1 Lattice parameters and particle sizes of the fabricated samples.

| Sample     | a (Å) | b (Å) | c (Å) | Phase      | Crystallite Size (nm) |
|------------|-------|-------|-------|------------|-----------------------|
| NCW        | 4.67  | 5.69  | 4.94  | Monoclinic | 25.06                 |
| NCW/ND-GCN | 4.70  | 5.71  | 4.96  | Monoclinic | 14.90                 |
| CZW        | 4.65  | 5.69  | 4.98  | Monoclinic | 35.19                 |
| CZW/ND-GCN | 4.69  | 5.72  | 4.95  | Monoclinic | 27.16                 |

**Table S2** Covalent bond distribution of N 1s binding energy of ND-GCN and bare-GCN.

| Binding Energy  | (C=N-C)              | (N-H)                | (C-NH <sub>2</sub> ) |
|-----------------|----------------------|----------------------|----------------------|
| <b>ND-GCN</b>   | 398.87 eV<br>58.78 % | 400.01 eV<br>31.65 % | 401.38 eV<br>9.57 %  |
| <b>bare-GCN</b> | 398.6 eV<br>51.09 %  | 399.5 eV<br>39.77 %  | 401.1 eV<br>9.14%    |

**Table S3** SEM-EDX elemental analysis of bulk-GCN and ND-GCN.

| Name of the Sample | Element | At (%) | Atomic ratio of C/N |
|--------------------|---------|--------|---------------------|
| <b>bulk-GCN</b>    | C       | 40.09  | 0.67                |
|                    | N       | 59.91  |                     |
| <b>ND-GCN</b>      | C       | 47.67  | 0.91                |
|                    | N       | 52.33  |                     |

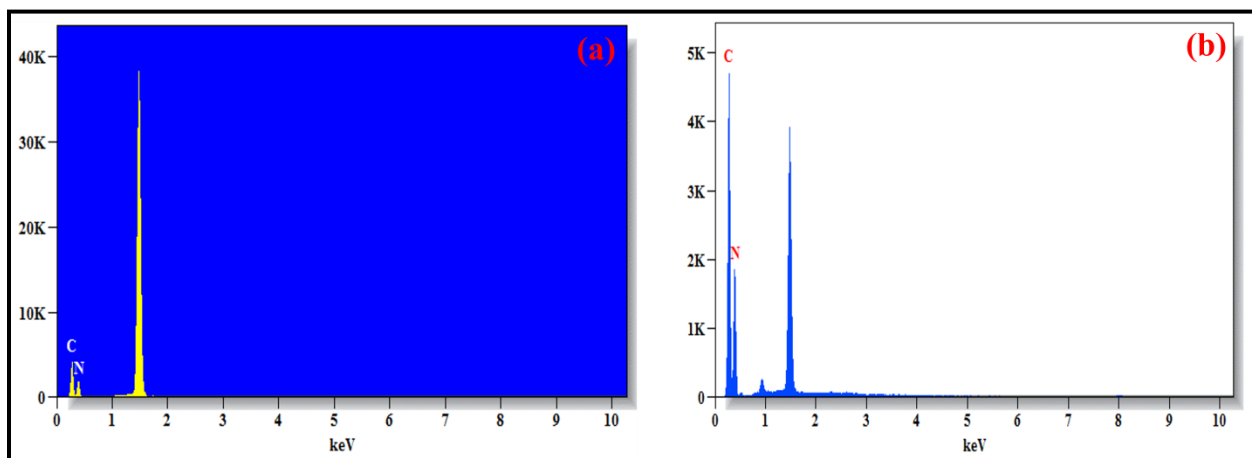

**Fig. S2** Energy dispersive spectra of (a) bulk-GCN; and (b) ND-GCN.

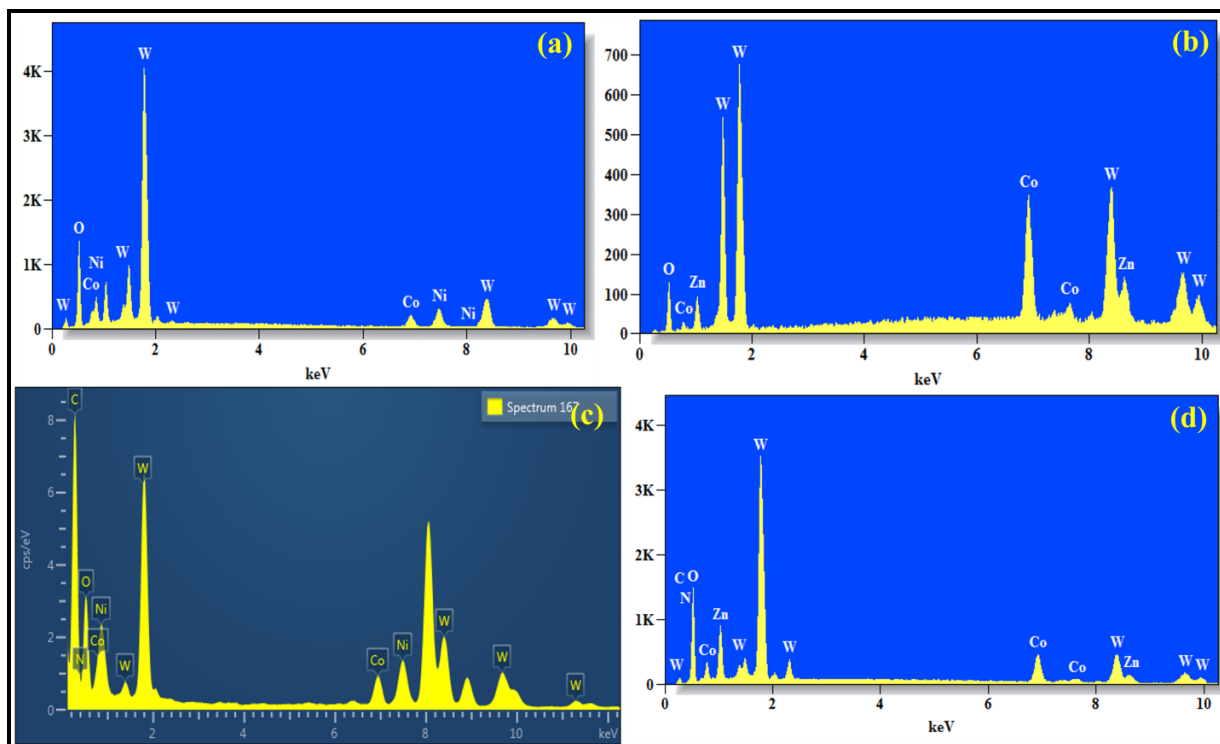

**Fig. S3** Energy dispersive spectra of (a) NCW; (b) CZW; (c) NCW/ND-GCN; and (d) CZW/ND-GCN nanocomposite.

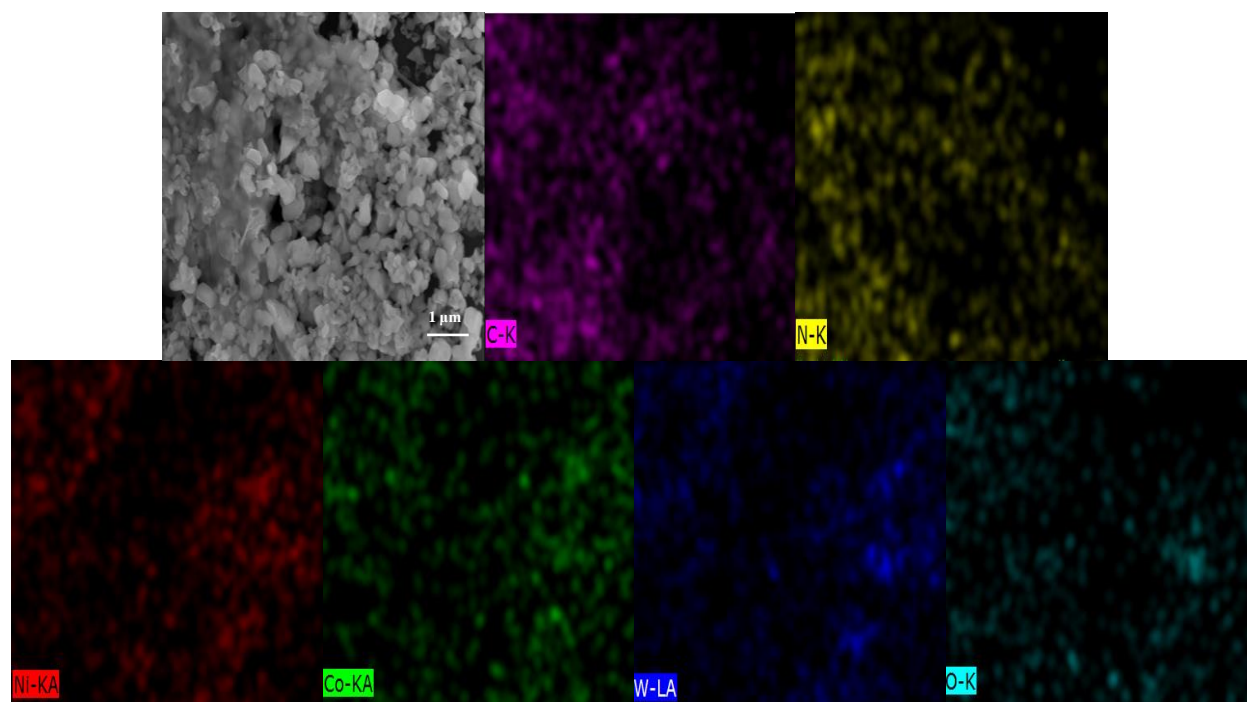

**Fig. S4** SEM-EDX elemental mapping of NCW/ND-GCN nanocomposite.

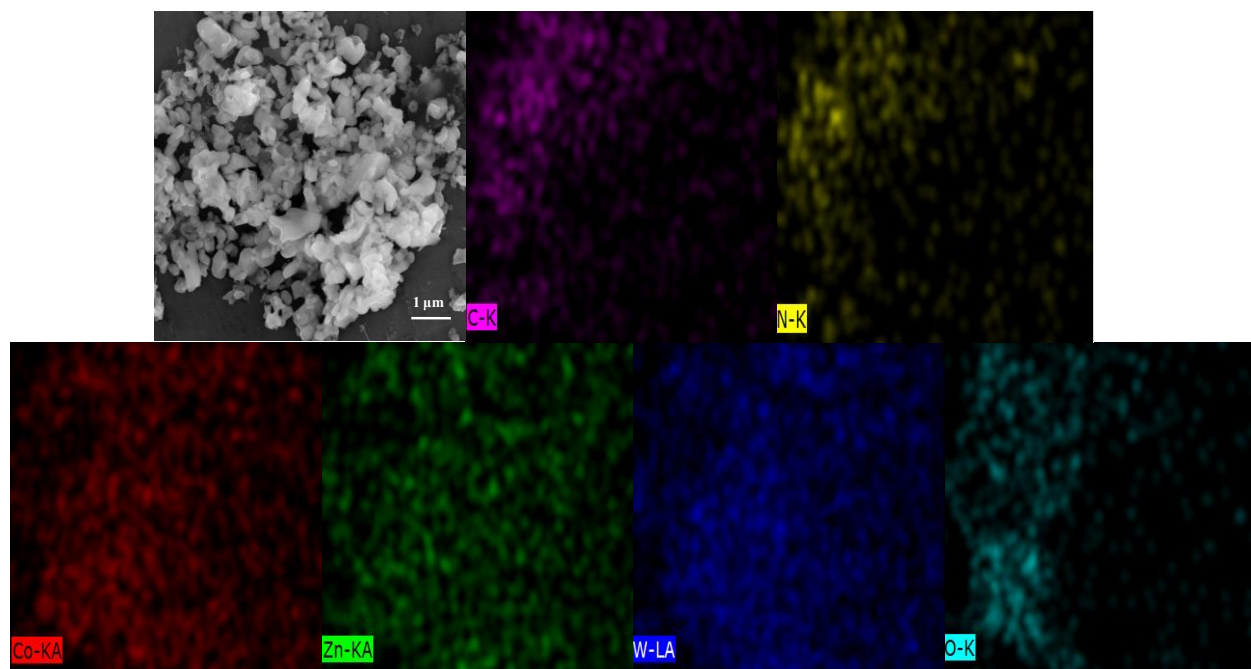

**Fig. S5** SEM-EDX elemental mapping of CZW/ND-GCN nanocomposite.

**Table S4** The CB and VB edge potentials of fabricated samples estimated using the Mulliken electronegativity concept and Mott Schottky studies.

| Concept                    | Conduction Band ( $E_{CB}$ ) |          |          | Valance Band ( $E_{VB}$ ) |          |          |
|----------------------------|------------------------------|----------|----------|---------------------------|----------|----------|
|                            | ND-GCN                       | NCW      | CZW      | ND-GCN                    | NCW      | CZW      |
| Mulliken electronegativity | -1.17 eV                     | +0.35 eV | +0.41 eV | +1.63 eV                  | +2.58 eV | +2.56 eV |
| Mott Schottky Study        | -1.16 eV                     | +0.29 eV | +0.39 eV | +1.64 eV                  | +2.52 eV | +2.54 eV |

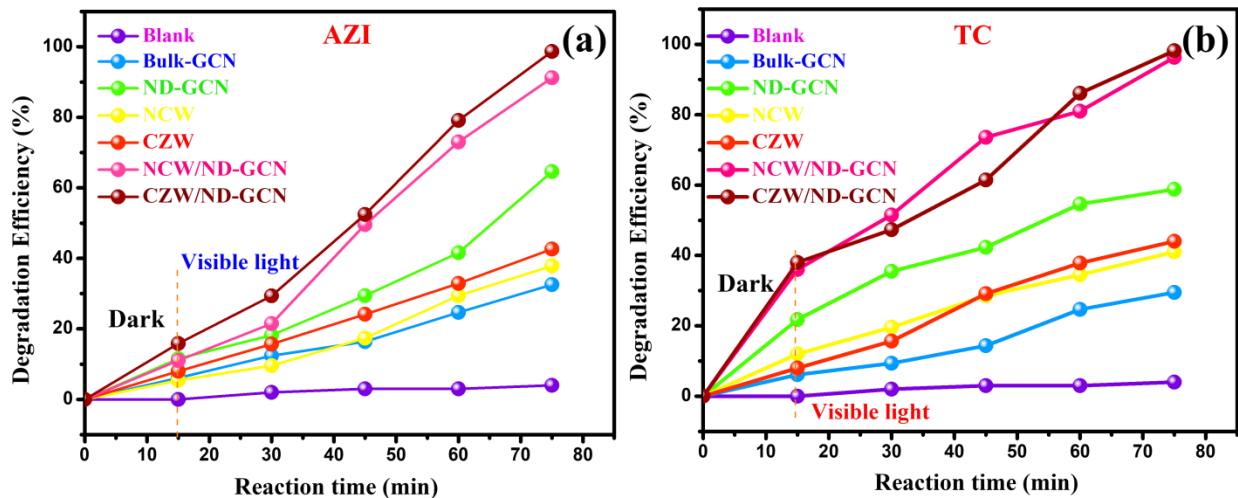

**Fig. S6** The dye degradation rate (%) of blank, bulk-GCN, ND-GCN, NCW, CZW, NCW/ND-GCN and CZW/ND-GCN nanocomposite at various irradiation times (min) over (a) AZI; b) TC antibiotic drugs.

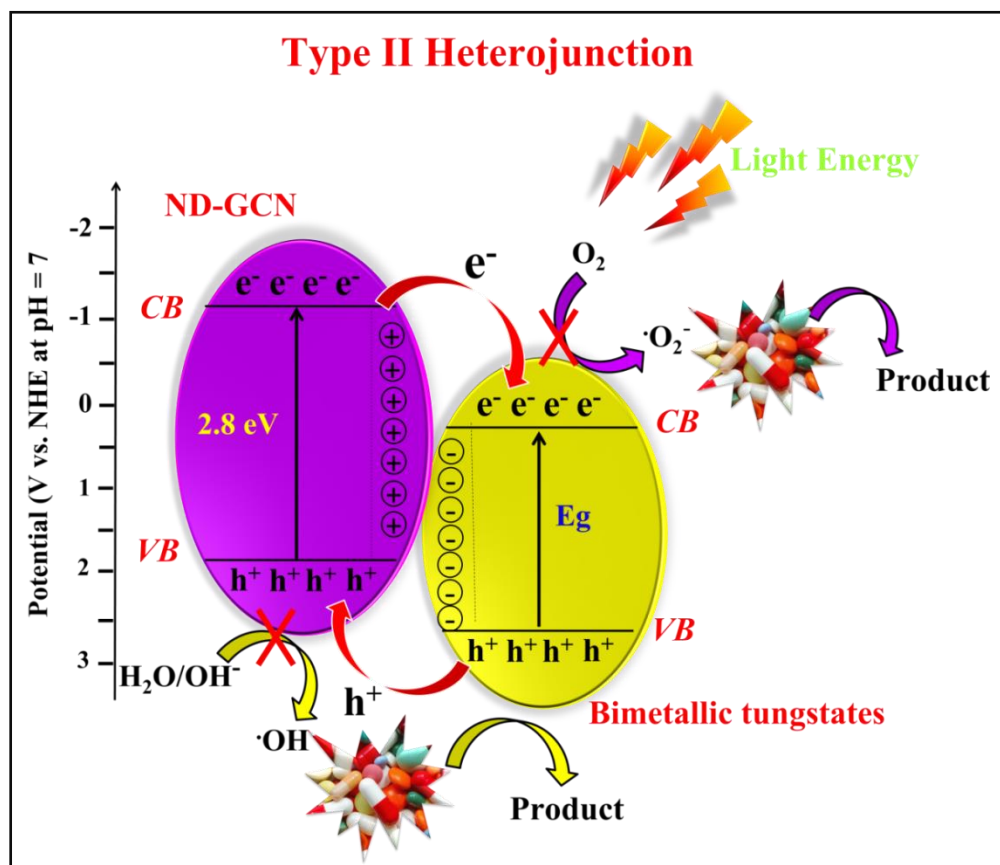

**Scheme S1** Deciphering the impossibility of type-II heterojunction formation.

**Table S5** Correlation of photocatalytic antibiotic degradation efficiency of current work with the several recently published bare tungstates and ND-GCN-based nanomaterials.

| <b>Name of the Photocatalyst</b>                 | <b>Weight of Catalyst</b> | <b>Concentration of organic pollutant</b> | <b>Source of visible light</b> | <b>Irradiation time (min)</b> | <b>Efficiency of degradation (%)</b> |
|--------------------------------------------------|---------------------------|-------------------------------------------|--------------------------------|-------------------------------|--------------------------------------|
| CuZnWO <sub>4</sub> /rGO <sup>58</sup>           | 50 mg                     | 100 mg L <sup>-1</sup>                    | 300 W Xe lamp                  | 80 min                        | 73 %                                 |
| Ni-CoWO <sub>4</sub> <sup>59</sup>               | 50 mg                     | 5 ppm                                     | 300 W Xe lamp                  | 150 min                       | 48.72 %                              |
| CuWO <sub>4</sub> <sup>60</sup>                  | 0.05 g                    | 15 ppm                                    | Fluorescent lamp-32 W          | 240 min                       | 80 %                                 |
| ND-g-C <sub>3</sub> N <sub>4</sub> <sup>61</sup> | 100 mg                    | 30 mg L <sup>-1</sup>                     | 300 W Xe lamp                  | 90 min                        | 80.61 %                              |
| ND-g-C <sub>3</sub> N <sub>4</sub> <sup>62</sup> | 50 mg                     | 10 mg L <sup>-1</sup>                     | 300 W Metal halide lamp        | 300 min                       | 100 %                                |
| This work<br>(CZW/ND-GCN)                        | 50 mg                     | 70 ml (Pharma effluent)                   | 300 W Xe lamp,<br>(Visible)    | 90 min                        | 97.84 %                              |
